# Supplementary material for: Creation and Validation of a Novel Sex‐Specific Mortality Risk Score in LVAD Recipients
Source: PubMed Central journal article supplement — J Am Heart Assoc. 2021 Mar 25;10(7):e020019. doi: 10.1161/JAHA.120.020019 (PMC8174331; doi:10.1161/jaha.120.020019), 2021-03-25
Supplement: JAH3-10-e020019-s001.pdf [file JAH3-10-e020019-s001.pdf]

# **SUPPLEMENTAL MATERIAL**

**Table S1. Baseline characteristics for males versus females in the Derivation and Validation Cohorts**

|                                                          | Derivation Cohort (n=9,113) |                   |         | Validation Cohort (n=6,074) |                   |         | P-Value for Difference between DC and VC |
|----------------------------------------------------------|-----------------------------|-------------------|---------|-----------------------------|-------------------|---------|------------------------------------------|
|                                                          | Male (n=7,230)              | Female (n=1,883)  | P-Value | Male (n=4,810)              | Female (n=1,264)  | P-Value |                                          |
| Age at implant, years                                    | 59 (49, 66)                 | 57 (45, 64)       | <0.001  | 59 (50, 66)                 | 56 (46, 64)       | <0.001  | 0.45                                     |
| BMI, kg/m <sup>2</sup>                                   | 27.2 (23.6, 31.7)           | 27.2 (22.7, 32.4) | 0.54    | 27.2 (23.7, 31.6)           | 27.3 (22.9, 33.1) | 0.78    | 0.50                                     |
| Ischemic Cardiomyopathy                                  | 2,934 (40.6%)               | 434 (23.0%)       | <0.001  | 1,962 (40.8%)               | 275 (21.8%)       | <0.001  | 0.86                                     |
| Cardiogenic Shock (INTERMACS 1 and 2)                    | 1,073 (14.8%)               | 303 (16.1%)       | 0.04    | 731 (15.2%)                 | 216 (17.1%)       | 0.04    | 0.42                                     |
| Dialysis, pre-implant                                    | 210 (2.9%)                  | 49 (2.6%)         | 0.54    | 143 (3.0%)                  | 38 (3.0%)         | 1.00    | 0.62                                     |
| Major infection during index hospitalization pre-implant | 398 (5.5%)                  | 119 (6.3%)        | 0.07    | 270 (5.6%)                  | 83 (6.6%)         | 0.07    | 0.73                                     |
| BUN, mg/dL                                               | 26 (18, 39)                 | 22 (15, 32)       | <0.001  | 26 (18, 38)                 | 22 (15, 32)       | <0.001  | 0.86                                     |
| Total Bilirubin, mg/dL                                   | 1.0 (0.7, 1.6)              | 0.8 (0.6, 1.4)    | <0.001  | 1.0 (0.7, 1.7)              | 0.8 (0.5, 1.3)    | <0.001  | 0.88                                     |
| ALT, U/L                                                 | 29 (19, 49)                 | 25 (17, 43)       | <0.001  | 28 (19, 49)                 | 25 (17, 42)       | <0.001  | 0.33                                     |
| Serum Sodium, meq/L                                      | 136 (132, 138)              | 136 (133, 138)    | <0.001  | 135 (132, 138)              | 136 (133, 139)    | <0.001  | 0.84                                     |
| INR                                                      | 1.2 (1.1, 1.4)              | 1.2 (1.1, 1.4)    | <0.001  | 1.2 (1.1, 1.4)              | 1.2 (1.1, 1.4)    | <0.001  | 0.24                                     |
| Hemoglobin, gm/dL                                        | 11.5 (9.9, 13)              | 10.6 (9.4, 12)    | <0.001  | 11.5 (9.9, 13)              | 10.6 (9.3, 11.9)  | <0.001  | 0.14                                     |
| Platelet count                                           | 183 (137, 236)              | 199 (143, 257)    | <0.001  | 185 (140, 236)              | 197 (143, 261)    | <0.001  | 0.31                                     |
| Albumin, gm/dL                                           | 3.5 (3.1, 3.9)              | 3.5 (3.0, 3.9)    | 0.58    | 3.4 (3.0, 3.9)              | 3.4 (3.0, 3.8)    | 0.47    | 0.09                                     |

|                                                |                |                |        |                |                |        |      |
|------------------------------------------------|----------------|----------------|--------|----------------|----------------|--------|------|
| PA Diastolic Pressure, mmHg                    | 25 (19, 31)    | 24 (18, 30)    | 0.007  | 25 (19, 31)    | 24 (18, 29)    | <0.001 | 0.81 |
| RA Pressure, mmHg                              | 11 (7, 16)     | 11 (7, 16)     | 0.98   | 11 (7, 16)     | 11 (7, 16)     | 0.12   | 0.33 |
| Echocardiographic Characteristics              |                |                |        |                |                |        |      |
| • Moderate to Severe TR                        | 2,616 (36.2%)  | 851 (45.2%)    | <0.001 | 1,741 (36.2%)  | 569 (45.0%)    | <0.001 | 0.98 |
| • LVEDD, cm                                    | 6.9 (6.2, 7.6) | 6.5 (5.8, 7.2) | <0.001 | 6.9 (6.2, 7.6) | 6.4 (5.8, 7.1) | <0.001 | 0.23 |
| Working for income                             | 1,254 (17.3%)  | 253 (13.4%)    | <0.001 | 814 (16.9%)    | 171 (13.5%)    | <0.001 | 0.41 |
| Major depression or other psychiatric disorder | 223 (3.1%)     | 107 (5.7%)     | <0.001 | 135 (2.8%)     | 67 (5.3%)      | <0.001 | 0.30 |
| Single, Divorced, or Widowed                   | 2,100 (29.0%)  | 820 (43.5%)    | <0.001 | 1,444 (30.0%)  | 537 (42.5%)    | <0.001 | 0.53 |

ALT: Alanine Aminotransferase; BMI: Body Mass Index; BUN: Blood Urea Nitrogen; INR: International Normalized Ratio; INTERMACS Profile: Interagency Registry for Mechanical Circulatory Support Profile; LVEDD: Left Ventricular End Diastolic Diameter; PA Diastolic Pressure: Pulmonary Artery Diastolic Pressure; RA Pressure: Right Atrial Pressure; TR: Tricuspid Regurgitation

**Table S2. Risk discrimination of IMACS-RS versus MELD in the Derivation and Validation Cohorts**

|                             | Female             |                             |         | Male               |                             |         |
|-----------------------------|--------------------|-----------------------------|---------|--------------------|-----------------------------|---------|
|                             | MELD               | IMACS-RS                    | P-value | MELD               | IMACS-RS                    | P-value |
| Derivation cohort (n=9,113) |                    |                             |         |                    |                             |         |
| AUC                         | 0.63 [0.59 - 0.67] | 0.73 [0.70 - 0.77]          | <0.0001 | 0.60 [0.57 - 0.62] | 0.71 [0.69 - 0.73]          | <0.0001 |
| NRI                         |                    | 59.65%<br>[47.02% - 72.29%] | <0.0001 |                    | 52.51%<br>[44.79% - 60.24%] | <0.0001 |
| IDI                         |                    | 0.068 [0.051 - 0.085]       | <0.0001 |                    | 0.049 [0.042 - 0.056]       | <0.0001 |
| Validation cohort (n=6,074) |                    |                             |         |                    |                             |         |
| AUC                         | 0.60 [0.54 - 0.65] | 0.71 [0.66 - 0.76]          | <0.0001 | 0.60 [0.57 - 0.63] | 0.69 [0.66 - 0.72]          | <0.0001 |
| NRI                         |                    | 33.84%<br>[20.90% - 46.78%] | <0.0001 |                    | 45.29%<br>[35.82% - 54.75%] | <0.0001 |

|     |  |                          |         |  |                          |         |
|-----|--|--------------------------|---------|--|--------------------------|---------|
| IDI |  | 0.076 [0.052<br>– 0.099] | <0.0001 |  | 0.037 [0.029<br>– 0.045] | <0.0001 |
|-----|--|--------------------------|---------|--|--------------------------|---------|

AUC: Area Under the Receiver Operating Characteristic curve; MELD: Model for End-Stage Liver Disease score; IDI: Integrated Discrimination Improvement index; IMACS-RS: ISHLT Mechanical Assisted Circulatory Support Registry- Risk Score; NRI: Net Reclassification Index

Table S3. Summary of LVAD mortality risk scores

| Risk Score  | % Females in Derivation Cohort | Predictors                                                                                                                                                                                                                                                                | Advantages                                                                                                                                                                                                 | Limitations                                                                                                                                                                                                                                                                                                                                                                                  |
|-------------|--------------------------------|---------------------------------------------------------------------------------------------------------------------------------------------------------------------------------------------------------------------------------------------------------------------------|------------------------------------------------------------------------------------------------------------------------------------------------------------------------------------------------------------|----------------------------------------------------------------------------------------------------------------------------------------------------------------------------------------------------------------------------------------------------------------------------------------------------------------------------------------------------------------------------------------------|
| <b>MELD</b> | 20%                            | <ul style="list-style-type: none"> <li>• Creatinine</li> <li>• Bilirubin</li> <li>• INR</li> </ul>                                                                                                                                                                        | <ul style="list-style-type: none"> <li>• Easy calculation based on 3 variables</li> <li>• Incorporates markers of multisystem dysfunction and coagulopathy</li> <li>• Predicts 90-day mortality</li> </ul> | <ul style="list-style-type: none"> <li>• No inclusion of sex-specific interaction effects</li> <li>• No sex-specific data on score performance provided</li> <li>• Derived from cohort with multifactorial liver disease</li> <li>• No documented cardiac dysfunction in derivation cohort</li> <li>• Poor performance in external validation studies</li> </ul>                             |
| <b>DTRS</b> | 18%                            | <ul style="list-style-type: none"> <li>• Platelet count</li> <li>• Albumin</li> <li>• INR</li> <li>• Vasodilator therapy</li> <li>• Mean pulmonary artery pressure</li> <li>• AST</li> <li>• Hematocrit</li> <li>• BUN</li> <li>• Lack of IV inotropic support</li> </ul> | <ul style="list-style-type: none"> <li>• Stratifies patients into four risk categories</li> <li>• Predicts 90-day and 1-year mortality</li> </ul>                                                          | <ul style="list-style-type: none"> <li>• No inclusion of sex-specific interaction effects</li> <li>• No sex-specific data on score performance provided</li> <li>• Developed in a pulsatile device cohort</li> <li>• Exclusion of BTT candidates</li> <li>• Requires pulmonary catheter measurement to calculate score</li> <li>• Poor performance in external validation studies</li> </ul> |
| <b>HMRS</b> | 23%                            | <ul style="list-style-type: none"> <li>• Age</li> <li>• Albumin</li> <li>• Creatinine</li> <li>• INR</li> <li>• Center volume &lt;15</li> </ul>                                                                                                                           | <ul style="list-style-type: none"> <li>• Easy calculation based on 5 variables</li> <li>• Stratifies patients into 3 risk categories</li> <li>• Predicts 90-day and 1-year mortality</li> </ul>            | <ul style="list-style-type: none"> <li>• No inclusion of sex-specific interaction effects</li> <li>• No sex-specific data on score performance provided</li> <li>• Score derived in a clinical trial population with only 1 pump type</li> </ul>                                                                                                                                             |

- Better risk discrimination than DTRS and MELD
- Modest performance in external validation studies

AST: Aspartate Aminotransferase; BTT: Bridge to Transplant; BUN: Blood Urea Nitrogen; DTRS: Destination Therapy Risk Score;

HMRS: HeartMate II Risk Score; INR: International Normalized Ratio; MELD: Model for End-Stage Liver Disease score

**Figure S1. Odds Ratios for candidate predictor variable association with 3-month mortality in multivariable models in the Derivation Cohort.**

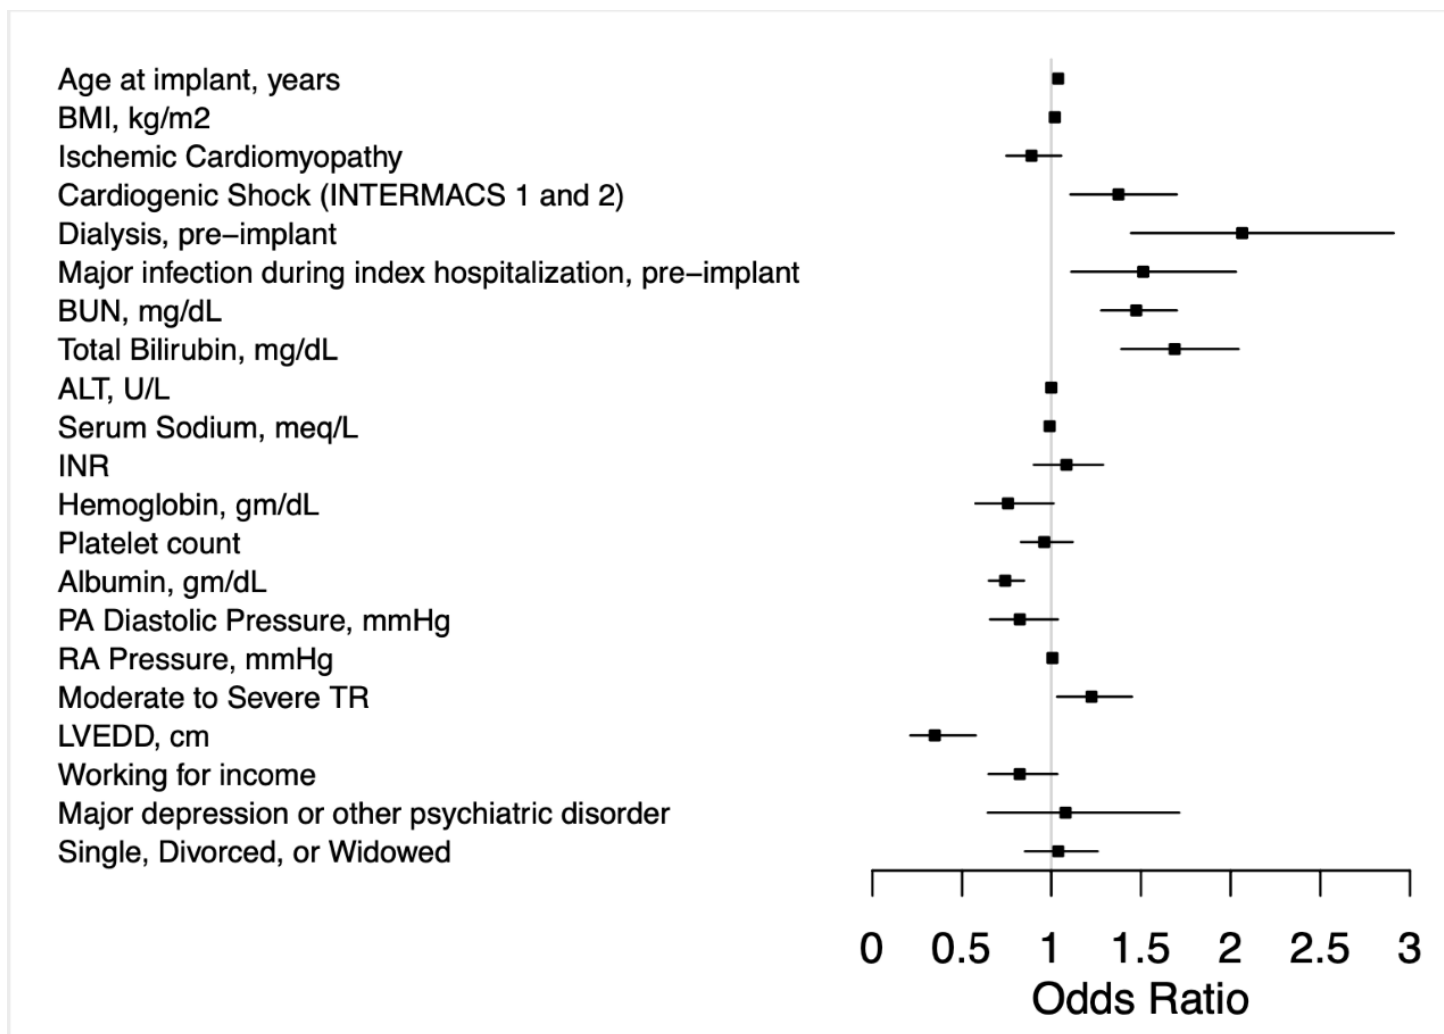



ALT: Alanine Aminotransferase; BMI: Body Mass Index; BUN: Blood Urea Nitrogen; INR: International Normalized Ratio;  
INTERMACS Profile: Interagency Registry for Mechanical Circulatory Support Profile; LVEDD: Left Ventricular End Diastolic  
Diameter; PA Diastolic Pressure: Pulmonary Artery Diastolic Pressure; RA Pressure: Right Atrial Pressure; TR: Tricuspid  
Regurgitation

**Figure S2. Sex-Stratified Odds Ratios for candidate predictor variable association with 3-month mortality in multivariable models in the Derivation Cohort.**

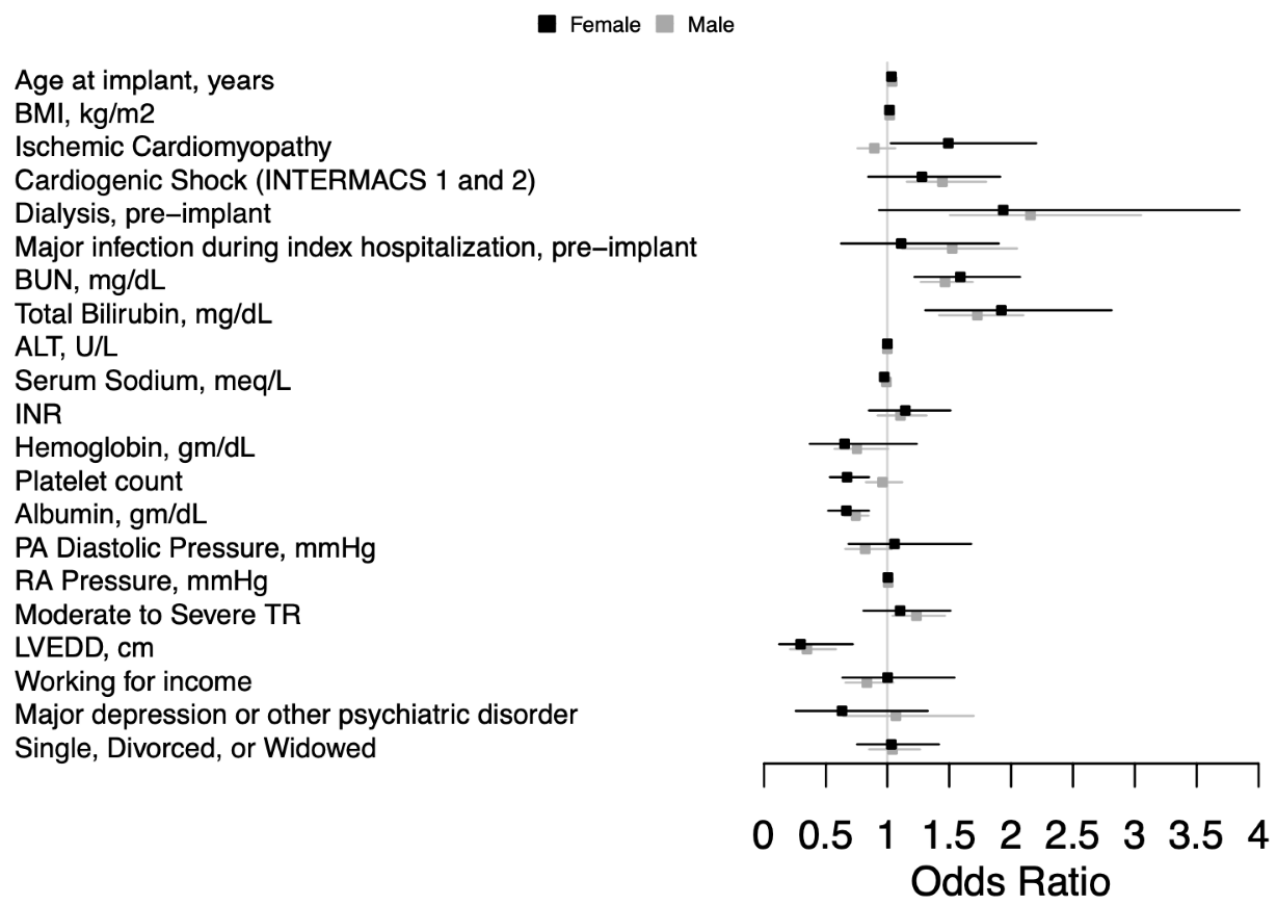

ALT: Alanine Aminotransferase; BMI: Body Mass Index; BUN: Blood Urea Nitrogen; INR: International Normalized Ratio;  
INTERMACS Profile: Interagency Registry for Mechanical Circulatory Support Profile; LVEDD: Left Ventricular End Diastolic  
Diameter; PA Diastolic Pressure: Pulmonary Artery Diastolic Pressure; RA Pressure: Right Atrial Pressure; TR: Tricuspid  
Regurgitation

Figure S3. Receiver Operating Characteristic (ROC) curves for IMACS-RS, HMRS and MELD, for prediction of 3-month mortality

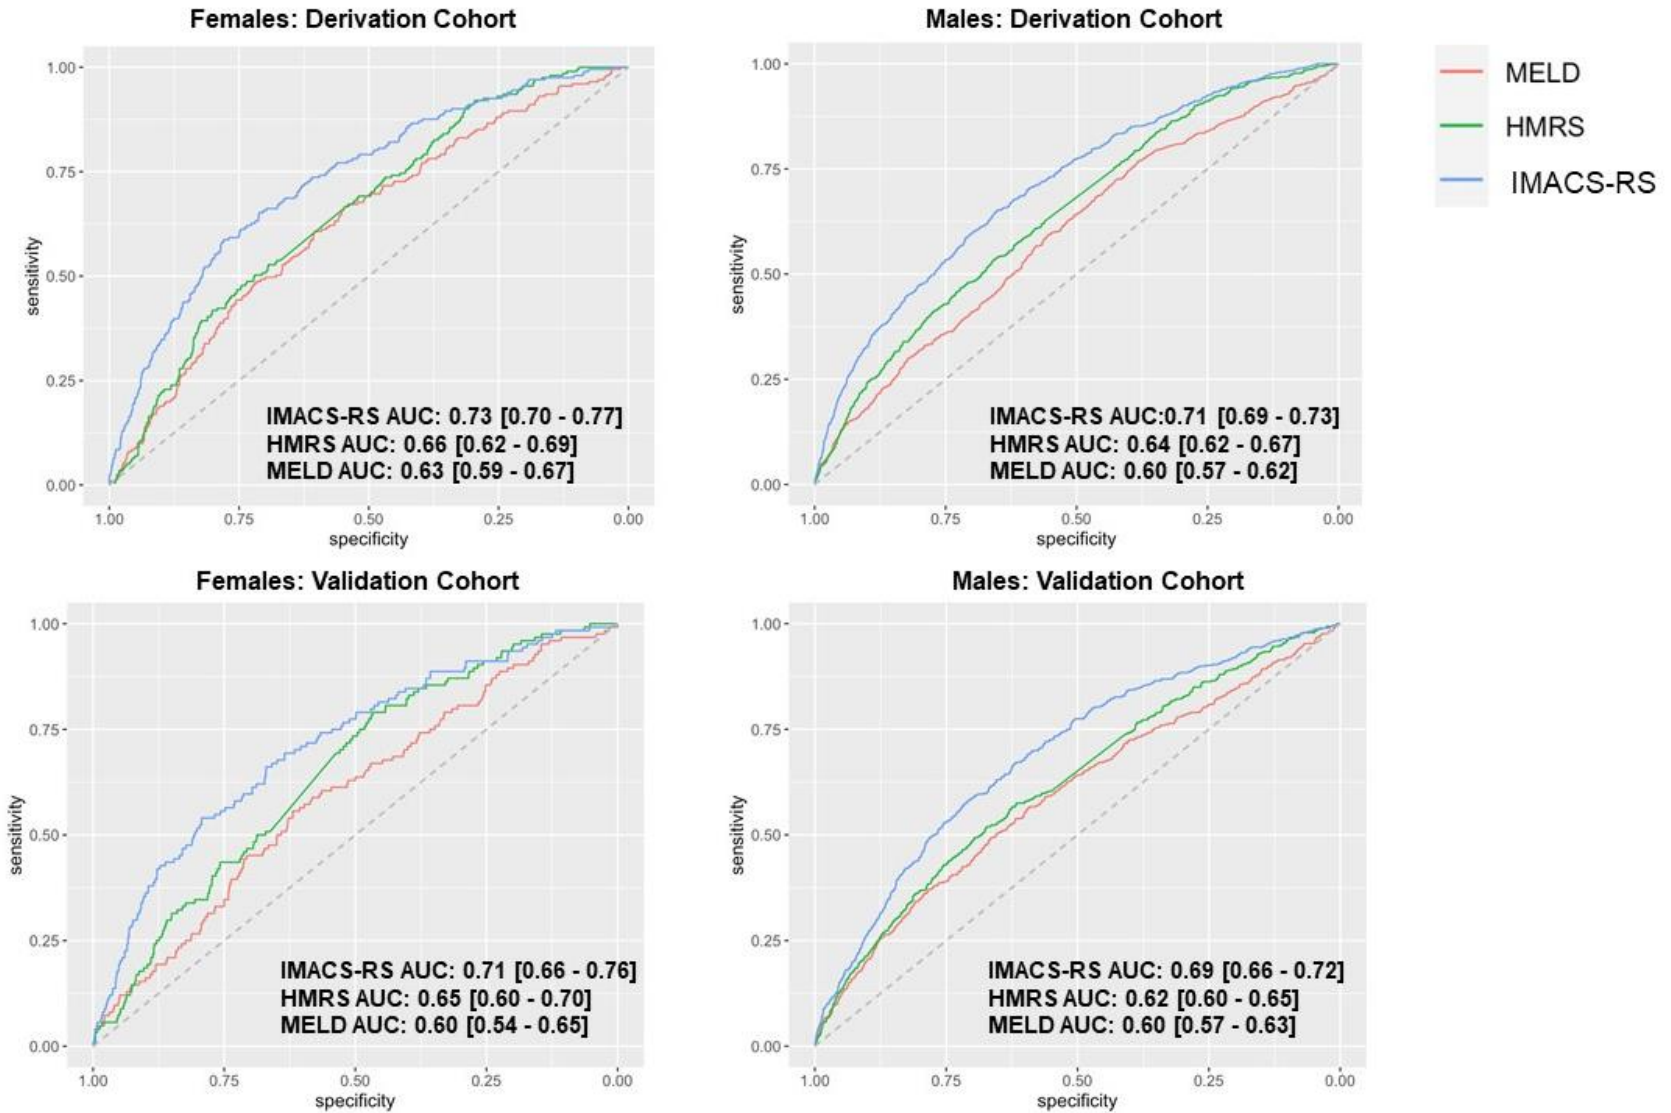

HMRS: HeartMate II Risk Score; IMACS-RS: ISHLT Mechanical Assisted Circulatory Support Registry- Risk Score; MELD: Model for End-Stage Liver Disease score

Figure S4. Calibration charts of predicted versus observed risk in Males according to sex-specific IMACS-RS quartile.

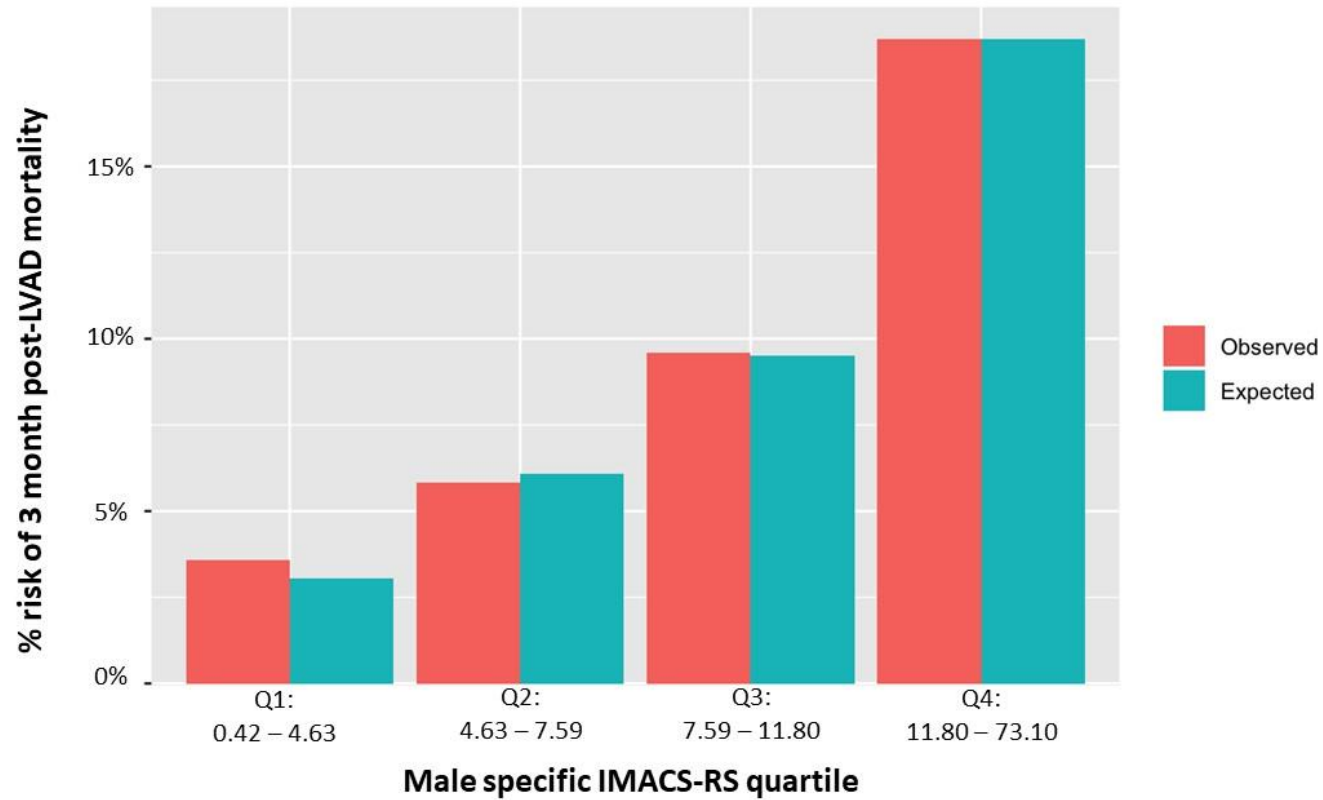

IMACS-RS: ISHLT Mechanical Assisted Circulatory Support Registry- Risk Score; LVAD: Left Ventricular Assist Device

Figure S5. Calibration charts of predicted versus observed risk in Females according to sex-specific IMACS-RS quartile.

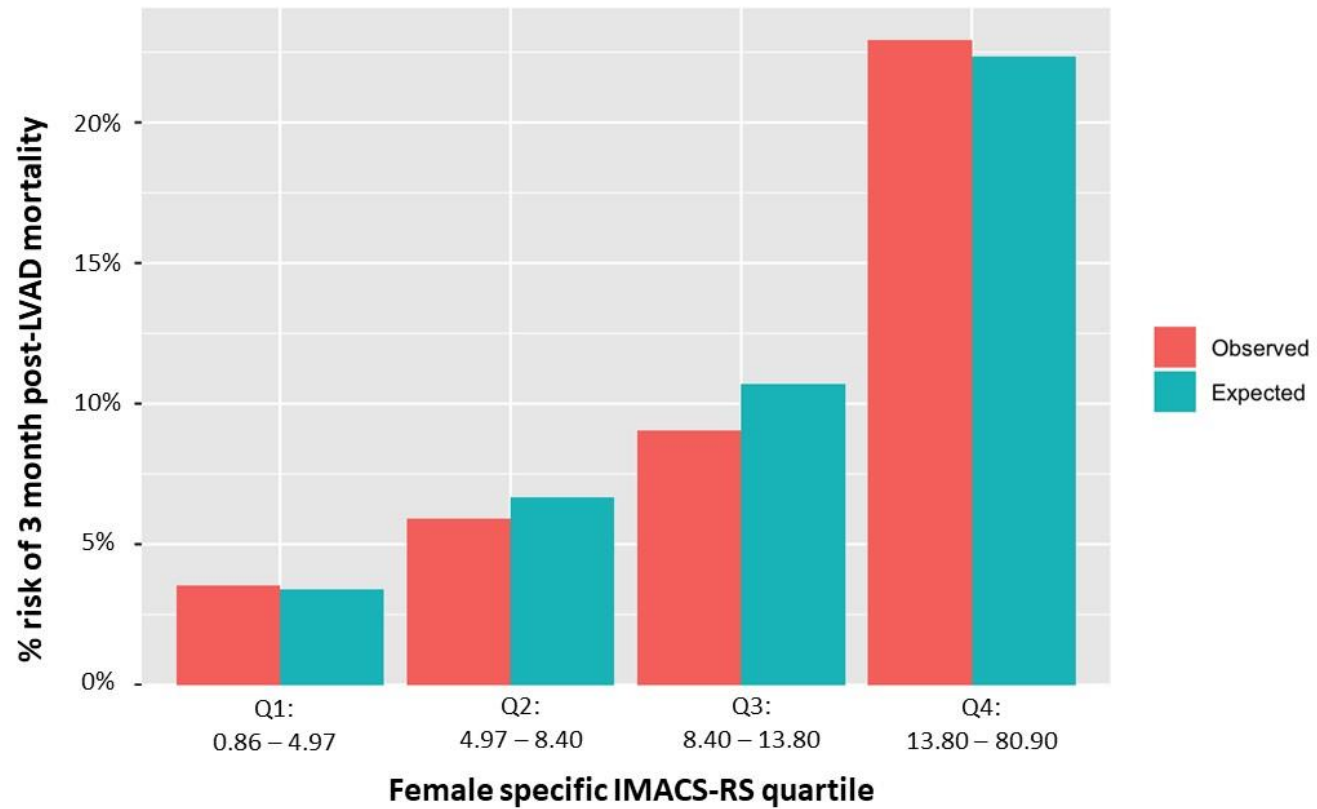

IMACS-RS: ISHLT Mechanical Assisted Circulatory Support Registry- Risk Score; LVAD: Left Ventricular Assist Device
